# Supplementary material for: Role for DNA methylation in the control of cell type–specific maspin expression
Source: Springer Nature journal article supplement (doi:10.1038/ng886), 2002-05-20
Supplement: 41588_2002_BFng886z_MOESM1_ESM.pdf [file 41588_2002_BFng886z_MOESM1_ESM.pdf]

# Web Fig. - A

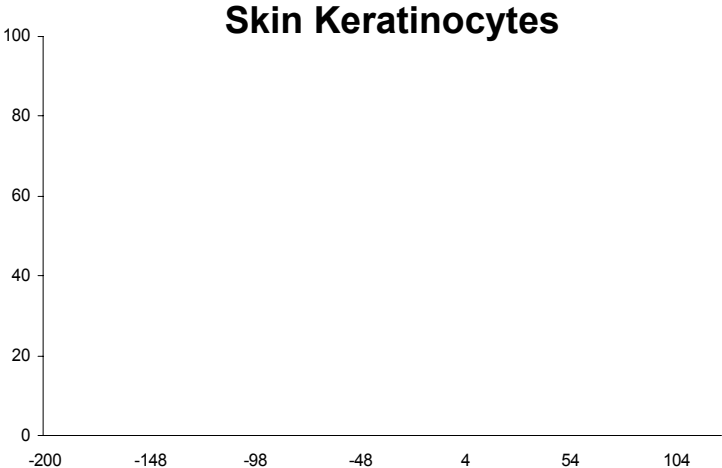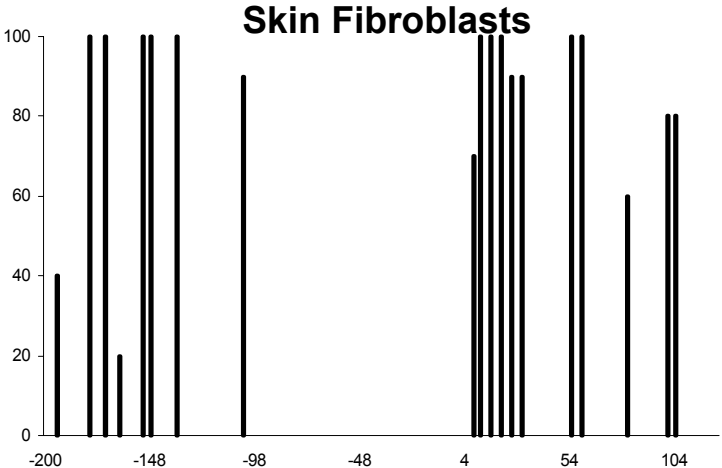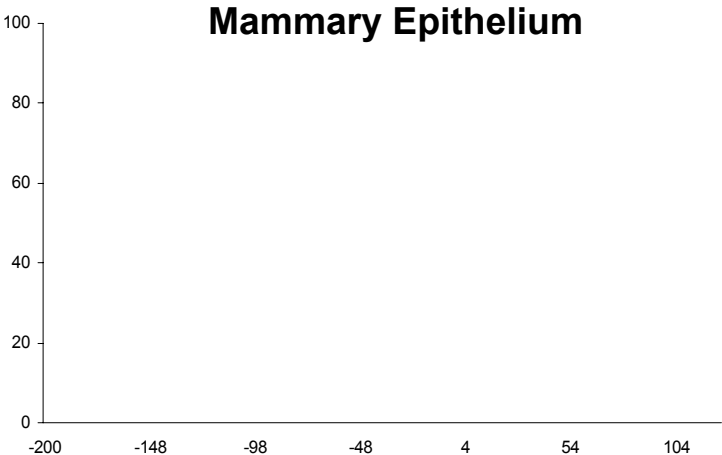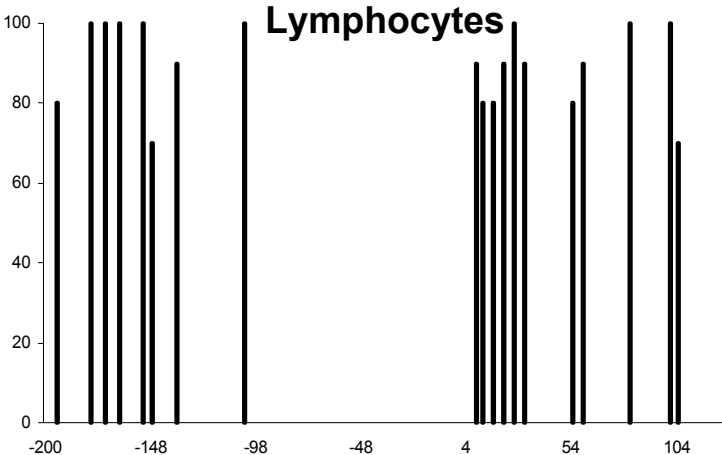

**Summary of 5-methylcytosine levels of bisulfite genomic sequencing of the opposing strand of the maspin promoter in 4 normal human cell types.** Ten cloned PCR products were sequenced to determine the percent methylation of the 19 CpG sites in the region analyzed. The x-axis is percent cytosine methylation and the y-axis is position relative to transcription start.
