# Supplementary material for: Role for DNA methylation in the control of cell type–specific maspin expression
Source: Springer Nature journal article supplement (doi:10.1038/ng886), 2002-05-20
Supplement: 41588_2002_BFng886z_MOESM2_ESM.pdf [file 41588_2002_BFng886z_MOESM2_ESM.pdf]

## Web Fig. - B

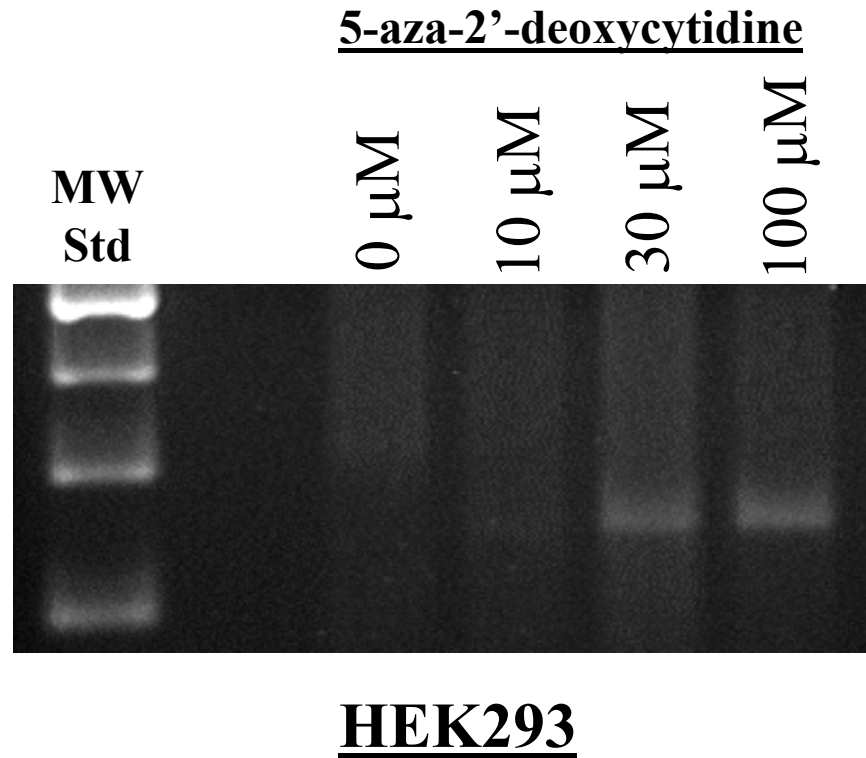

**Chromatin structure of the maspin promoter in HEK293 cells following 5-aza-2'-deoxycytidine treatment.** Intact nuclei were isolated from untreated and treated HEK 293 cells, and then were digested *in vivo* with MspI, for which there is a single site in the maspin promoter. Following the *in vivo* digestion, genomic DNA was isolated and MspI-specific linkers were ligated. This linker “marks” accessible sites of chromatin, and accessible chromatin is revealed as the production of a PCR product following amplification with maspin promoter-specific primers paired with a primer complementary to the linker. PCR products were size separated on a 3% agarose gel and visualized by ethidium bromide staining.
