# Supplementary material for: Role for DNA methylation in the control of cell type–specific maspin expression
Source: Springer Nature journal article supplement (doi:10.1038/ng886), 2002-05-20
Supplement: 41588_2002_BFng886z_MOESM3_ESM.pdf [file 41588_2002_BFng886z_MOESM3_ESM.pdf]

## Web Fig. C

### VA-13 - untreated

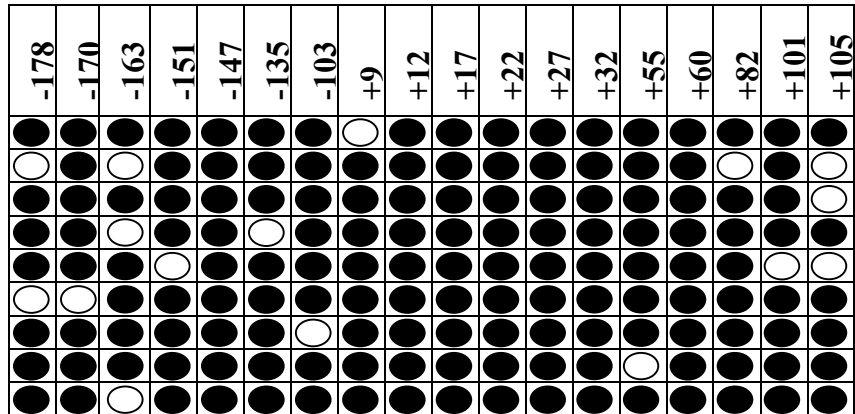

### VA-13 - 100 $\mu$ M 5-aza-dC

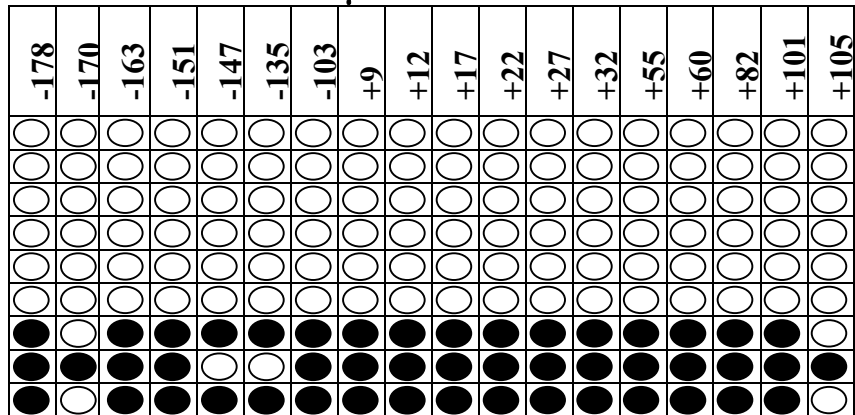

**Cytosine methylation pattern of the *maspin* promoter in the human lung fibroblast cell line VA13 before and after treatment with 100  $\mu$ M 5-aza-dC.** Nine cloned PCR products were sequenced to determine the percent methylation of the 19 CpG sites in the *maspin* promoter region. Each row of circles represents the cytosine methylation pattern obtained from individual clones of the *maspin* promoter. The position of each CpG site relative to transcription start is shown. Open circles indicate unmethylated CpG sites, filled circles indicate methylated CpG sites. Significant and complete demethylation is seen in VA13 cells treated with 5-aza-dC, whereas all alleles in untreated VA13 cells are extensively methylated.
